# Supplementary material
Source: Springer Nature journal article supplement (https://www.springermedizin.de/resource/supplementary/13024_2010_150_MOESM3_ESM.pdf/9643486)

**a.****Cortex****PDGF-B/PDGFR $\beta$** 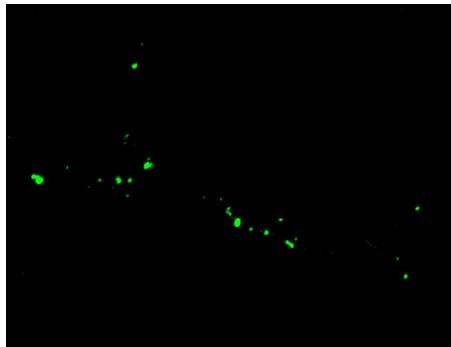
**PDGFR $\beta$**   
**PDGF-B/PDGFR $\beta$**   
**LECTIN**
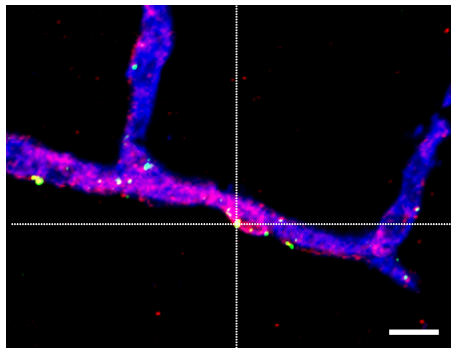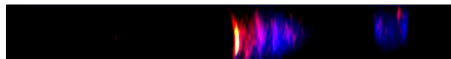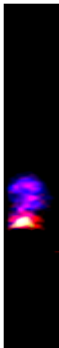**b.****CA1  
Hippocampus****PDGF-B/PDGFR $\beta$** 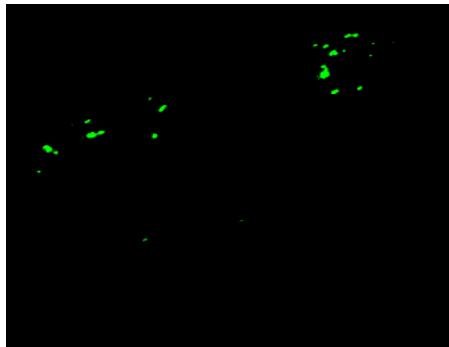
**PDGFR $\beta$**   
**PDGF-B/PDGFR $\beta$**   
**LECTIN**
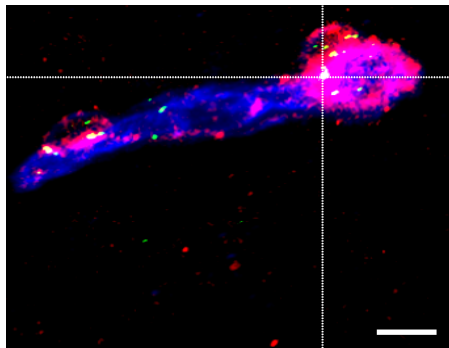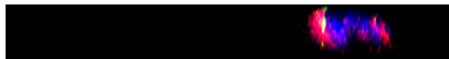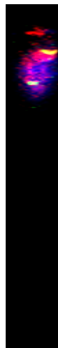

Supplement: MOESM3 [file 9643486]
